# 1 **A dual antigen ELISA allows the assessment of SARS-CoV-2 antibody** 2 **seroprevalence in a low transmission setting**

3

4 Sarah M. Hicks,<sup>1\*</sup> Kai Pohl,<sup>2,3\*</sup> Teresa Neeman,<sup>4</sup> Hayley A. McNamara,<sup>2</sup> Kate M. Parsons,<sup>5</sup>  
5 Jin-shu He,<sup>5</sup> Sidra A. Ali,<sup>1</sup> Samina Nazir,<sup>1</sup> Louise C. Rowntree,<sup>6</sup> Thi H. O. Nguyen,<sup>6</sup>  
6 Katherine Kedzierska,<sup>6</sup> Denise L. Doolan,<sup>7</sup> Carola G. Vinuesa,<sup>2,8,9</sup> Matthew C. Cook,<sup>2,9</sup>  
7 Nicholas Coatsworth,<sup>10,11</sup> Paul S. Myles,<sup>12,13</sup> Florian Kurth,<sup>3</sup> Leif E. Sander,<sup>3</sup> Graham J.  
8 Mann,<sup>1</sup> Russell L. Gruen,<sup>14</sup> Ameer J. George,<sup>1,5</sup> Elizabeth E. Gardiner,<sup>1†</sup> Ian A. Cockburn.<sup>2†#</sup>  
9 and the SARS-CoV-2 Testing in Elective Surgery Collaborators<sup>15</sup>

10

11 1. ACRF Department of Cancer Biology and Therapeutics, John Curtin School of Medical  
12 Research, The Australian National University, Canberra, Australia

13 2. Department of Immunology and Infectious Disease, John Curtin School of Medical  
14 Research, The Australian National University, Canberra, Australia

15 3. Department of Infectious Diseases and Respiratory Medicine, Charité, Universitätsmedizin  
16 Berlin, Berlin, Germany

17 4. Biological Data Science Institute, John Curtin School of Medical Research, The Australian  
18 National University, Canberra, Australia

19 5. ANU Centre for Therapeutic Discovery, The Australian National University, Canberra,  
20 Australia

21 6. Department of Microbiology and Immunology, Peter Doherty Institute, University of  
22 Melbourne, Melbourne, Australia.

23 7. Centre for Molecular Therapeutics, Australian Institute of Tropical Health and Medicine,  
24 James Cook University, Cairns, Australia.

**NOTE: This preprint reports new research that has not been certified by peer review and should not be used to guide clinical practice.**

- 25 8. China Australia Centre for Personalised Immunology, Shanghai Renji Hospital, Jiaotong  
26 University, Shanghai, China.
- 27 9. Department of Immunology Canberra Hospital, Canberra, Australia.
- 28 10. ANU Medical School, Australian National University, Canberra, Australia
- 29 11. The Canberra Hospital, Infectious Diseases, Canberra, Australia
- 30 12. Department of Anaesthesiology and Perioperative Medicine, Alfred Hospital, Melbourne,  
31 Australia.
- 32 13. Department of Anaesthesiology and Perioperative Medicine, Monash University,  
33 Melbourne, Australia
- 34 14. College of Health and Medicine, Australian National University, Canberra, Australia
- 35 15. See Supplementary Text

36

37 † and \* These authors contributed equally

38 #Corresponding Author

39

40 Running Title: Seroprevalence of SARS-CoV-2 in Australia

41

42 Word count (abstract): 98

43 Word count (main text): 1969

44 **Notes**

45

46 **Conflict of Interest Statement:** NC is an employee of the Australian Government

47 Department of Health and Ageing contributed to study design, interpretation of results, and  
48 approval of the manuscript. All other authors declare no competing interests.

49

50 **Funding:** The study was sponsored by the Australian Government Department of Health and  
51 Ageing and Medibank Private.

52

53

54 **Corresponding Author Contact Details:** [ian.cockburn@anu.edu.au](mailto:ian.cockburn@anu.edu.au) +61 (0)2 6125 4619

55 Department of Immunology and Infectious Disease, John Curtin School of Medical Research,  
56 The Australian National University, Canberra, Australia

57

58 **Abstract**

59

60 Estimates of seroprevalence of SARS-CoV-2 antibodies have been hampered by inadequate  
61 assay sensitivity and specificity. Using an ELISA-based approach to that combines data  
62 about IgG responses to both the Nucleocapsid and Spike-receptor binding domain antigens,  
63 we show that near-optimal sensitivity and specificity can be achieved. We used this assay to  
64 assess the frequency of virus-specific antibodies in a cohort of elective surgery patients in  
65 Australia and estimated seroprevalence in Australia to be 0.28% (0 to 0.72%). These data  
66 confirm the low level of transmission of SARS-CoV-2 in Australia before July 2020 and  
67 validate the specificity of our assay.

68

69 **Key words:** SARS-CoV-2, COVID19, seroprevalence, ELISA, antibodies

## 70 **Introduction**

71

72 Reported cases of severe acute respiratory syndrome coronavirus 2 (SARS-CoV-2) are likely  
73 to represent only a fraction of actual SARS-CoV-2 infections, as ~40% of cases are mild or  
74 asymptomatic, or otherwise undiagnosed [1]. Detection of antibodies that recognize viral  
75 antigens specific for SARS-CoV-2 has become an important molecular sentinel of current or  
76 prior exposure to SARS-CoV-2 [2]. Measurement of antibody levels can provide information  
77 regarding the status of infection in an individual, as well as indicate the rate and extent of  
78 response to treatment and to recovery. Since a significant number of people either present  
79 with mild symptoms of COVID19 infection or are asymptomatic, serological measurements  
80 will have ongoing utility in gauging exposure and prevalence in the community [3]. Such  
81 studies will provide valuable information on the time course and longevity of antibody  
82 responses to SARS-CoV-2 [4]. Further, serological testing is likely to be valuable in the  
83 assessment of vaccine efficacy. However, analyses of seroprevalence, especially in low  
84 prevalence settings are hampered by assays with inadequate sensitivity and specificity [5].

85

86 Australia has reported low case numbers of COVID-19 per head of population compared to  
87 other developed Westernized countries, especially before the July/August 2020 outbreak in  
88 Melbourne, Victoria (Australian Department of Health). Efforts to control the spread of the  
89 virus have likely been helped by relative geographical isolation and an advanced healthcare  
90 system. However nucleic acid testing generally only reveals a fraction of the total numbers of  
91 infections thus the overall numbers of previous infections is unknown [3, 6]. Nonetheless it is  
92 likely that the total of previously infected individuals is low as a proportion of the population  
93 (<1%) and thus assessment of seroprevalence requires the use of highly sensitive and specific  
94 methodologies. In order to assess the seroprevalence of SARS-CoV-2 in Australia we

- 95 therefore developed a dual-antigen ELISA assay which gave superior sensitivity and
- 96 specificity compared to assays that rely on single antigens.

## 97 **Materials and Methods**

98

### 99 *Samples and ethics statement*

100

101 Collection of blood from individuals pre-2020 was carried out after provision of informed  
102 consent, using procedures approved by the Human Research Ethics Committees (HREC) of  
103 the Australian National University (2016/317) and ACT Health (1.16.011 and 1.15.015).  
104 Samples from SARS-CoV-2 positive individuals were collected after consent under the  
105 following protocols: Alfred Hospital HREC (280/14); James Cook University HREC  
106 (#H7886); ACT Health HREC (1.16.011); Charité Ethics Committee (EA2/066/20) [7].  
107 Approval for the elective surgery study was given by Alfred Hospital Ethics Committee  
108 (339/20) and the Australian National University (2020/379). Whole blood was collected by  
109 venipuncture into an empty syringe (healthy donors) or a red capped serum vacutainer tube  
110 (patients), rested for 1 h then centrifuged (1000g, 10 min, 4°C) and the upper serum phase  
111 removed by aspiration to a new tube and immediately frozen. All samples were heated to  
112 56°C for 1 h prior to analysis.

113

### 114 *ELISA protocol*

115

116 Our ELISA protocol was based on previously published methodologies with modifications  
117 [8]. Briefly, white 96-well maxisorp microtitre plates (Nunc 436110) were coated overnight  
118 at 4°C with 100 µL of 500 ng/mL Spike RBD (GenScript, Z03483) or Nucleocapsid  
119 (GenScript, Z03480) protein in 1X Dulbecco's phosphate-buffered saline (PBS) pH 7.4  
120 (Sigma D1408). Wells were washed three times with PBS containing 0.2% (v/v) Tween-20  
121 (PBS-T), blocked with 100 µL 3% (w/v) BSA in PBS with 0.1% (v/v) Tween-20 for 1 h at

122 room temperature (RT), then washed once with PBS-T, before addition of 50  $\mu$ L serum  
123 diluted to 1:100 in 1% (w/v) BSA in PBS with 0.1% (v/v) Tween-20. Plate washing was  
124 performed by repeated plunging of plates into a bucket filled with PBS-T and flicking of well  
125 contents into a sink. After 1 h incubation at RT, wells were washed five times with PBS-T  
126 and incubated with 100  $\mu$ L of horseradish peroxidase (HRP)-conjugated anti-human IgG,  
127 IgM or IgA antibodies diluted to the optimal concentration in 1% BSA (w/v) in PBS with  
128 0.1% Tween-20 for 1 h at RT. Wells were washed five times with PBS-T then 100  $\mu$ L of  
129 Super Signal ELISA Pico enhanced chemiluminescent (ECL) substrate (Pierce, Rockford, IL,  
130 USA) was added and light emission (stable after 1 min) was measured using a Victor-Nivo  
131 luminescence plate reader. For high throughput screening of samples, steps downstream of  
132 sample addition were automated as outlined in the supplementary materials and methods.

133

#### 134 *Statistical analysis*

135

136 ELISA data was expressed as the normalized  $\text{Log}_{10}$  emission at 700nm. ROC analysis and  
137 cutoffs were determined using GraphPad Prism 8 software. Estimates of seroprevalence were  
138 calculated using R with 95% confidence intervals were calculated by bootstrapping. Bayesian  
139 analysis to determine the probability of positivity for each sample was determined using R  
140 based on the distributions of the positive and negative values described as mixed  
141 distributions. Full details of statistical analysis and R codes are given the Supplementary  
142 Materials and Methods.



143 **Results**

144

145 *Optimization of manual and automated ELISA protocol conditions*

146

147 To optimize our assay we used a library of 184 serum samples collected pre-2020 as negative  
148 controls, and a panel of 43 sera from individuals infected with SARS-CoV-2 as positive  
149 controls. Initial optimization of assay conditions was carried out with defined pools of sera  
150 from 5 positive donors and 5 negative donors. Noting that even small gains in specificity can  
151 substantially reduce the number of false negatives in large sero-surveys, we optimized the  
152 concentration and amount of antigen used for coating, blocking and washing conditions.  
153 Overall, we found that the principal factors affecting assay performance were the coating  
154 conditions and the necessity of stringent washing (Table S1 and Figure S1).

155

156 To handle large numbers of samples we optimized our ELISA assay for automation. We  
157 investigated the use of an enhanced chemiluminescence (ECL) substrate as these substrates  
158 have superior sensitivity compared to traditional colorimetric absorbance substrates such as  
159 *O*-phenylenediamine dihydrochloride (OPD) [9] and do not require a stopping step  
160 facilitating automation. Comparing different protocols to distinguish our responses to the N  
161 antigen in positive and negative donors we determined that ECL was marginally superior to  
162 OPD with a larger separation between positive and negative control values (Figure S2 A and  
163 B). Importantly, conducting the analysis on a robotic platform did not compromise assay  
164 sensitivity and specificity (Figure S2 C-D).

165

166 *Combining IgG responses to multiple antigens gives optimal sensitivity and specificity*

167

168 Having established optimal ELISA conditions, we wanted to determine the optimal antigen,  
169 or combination of antigens for seroprevalence surveys. We therefore compared responses to  
170 the full S1 domain of the Spike protein (S1), Nucleocapsid protein (N) and the receptor  
171 binding domain (RBD) of the Spike protein. Overall, the sensitivity and specificity of  
172 responses to the N and RBD were comparable, with the N protein being slightly superior  
173 (Figure 1 A and B). Surprisingly, the S1 protein gave very poor sensitivity and specificity  
174 with many negative samples giving high values (Figure S3). We next investigated the  
175 possibility of combining data for both antigens. Plotting responses to the RBD and N  
176 antigens revealed that even the less responsive positive control samples generally had at least  
177 elevated responses to both antigens (Figure 1C). Thus, using the mean of the responses to the  
178 RBD and N responses, we found that a cutoff of 1.302 gave 100% sensitivity and 98.91%  
179 specificity (Figure 1D). Neither IgA nor IgM responses distinguished positive and negative  
180 donors as well as IgG, and averaging IgA or IgM responses to both antigens did not  
181 substantively improve the assay (Figure S4).

182

### 183 *The seroprevalence of SARS-CoV-2 is low in Australia*

184

185 We next used our dual-antigen IgG ELISA to assess the seroprevalence of SARS-CoV-2  
186 infection among 2991 individuals, providing blood samples at 10 hospital sites across 4 states  
187 in Australia in May and June 2020. These individuals were enrolled in a prospective cohort  
188 study to determine the prevalence of asymptomatic SARS-CoV-2 infection in individuals  
189 undergoing elective surgery in Australia; full demographic information is given in the full  
190 manuscript describing this prospective cohort study separately (Coatsworth *et al.* Submitted).  
191 In our initial screen 41/2991 were above our cutoff of 1.302 (Figure 2A), correcting for the  
192 specificity of our assay we calculated the seroprevalence to be 0.28% (0 to 0.71%). To

193 confirm our positive results, we retested the top 2.7% of samples from each site in parallel  
194 with our complete set of positive and negative control samples. In this analysis 15 individuals  
195 remained above the 100% specificity cutoff (Figure 2B), however plotting the RBD and N  
196 values showed that only 5 samples were strongly positive for both antigens, clustering with  
197 our positive controls. In contrast the remaining 10 putative positives were close to the cutoff  
198 and were in many cases strongly positive for only one or other antigen, thus we reasoned  
199 these might be false positives. Of note, 1/5 (20%) of our high-confidence positive samples  
200 was a contact of a known SARS-CoV-2+ individual, compared to 14/2986 (0.47%) in the  
201 remainder of the cohort ( $p=0.0248$  by two-tailed Fisher's exact test; odds ratio=53.1 (4.07-  
202 357) giving us confidence that our assay was detecting true positive individuals.

203

204 To avoid biases associated with the use of cutoffs we also calculated the probability of each  
205 of our 80 retested samples being positive based on the known distributions of the positive and  
206 negative results (Figure 2C). This analysis determined that the top 6 samples each had a  
207 >50% (58-99%) probability of being positive, while the remaining 9 potentially positive  
208 samples had individual probabilities of being positive of 10-47%. By summing the  
209 probabilities of positivity among these samples we can estimate that ~8 (0.27%) individuals  
210 in our cohort would be positive which is similar to our original estimate of seroprevalence.

## 211 **Discussion**

212

213 Here we report results from the first large scale seroprevalence survey in Australia. We  
214 estimate a seroprevalence of 0.28%, which - given a population estimate for Australia of  
215 25.50 million individuals - equates to 71,400 infections (95% CI: 0 to 181,050). At start of  
216 sample collection (2<sup>nd</sup> June) 7387 cases/102 deaths had been reported in Australia, rising to  
217 11,190 cases/116 deaths by 17<sup>th</sup> July when sample collection finished suggesting that testing  
218 was capturing 10-15% of cases and that there was a low case fatality rate, similar to other  
219 jurisdictions with high testing rates [10]. Note that due to the small number of positive  
220 samples we have not attempted to stratify our analysis based on the demographic  
221 characteristics of our cohort. A key caveat of our study is that the positive controls used for  
222 assay validation are skewed to hospitalized individuals and thus we do not know with  
223 certainty the performance characteristics of the assays for asymptomatic cases who are  
224 known to have lower antibody levels [4, 11]. Moreover, a recent study has suggested that  
225 asymptomatic cases may not always seroconvert, though the assays used there had lower  
226 sensitivity than we report for our assay [5, 11]. Overall however, these data suggest that the  
227 low case number seen in Australia was reflective of low community transmission not  
228 inadequate testing. This is supported by the fact that the subsequent outbreak in Melbourne in  
229 July/August 2020 emerged from breaches of hotel quarantine of overseas travelers rather than  
230 undetected community transmission.

231

232 A variety of assays of have been put forward for the assessment of seroprevalence of  
233 antibodies to SARS-CoV-2. Lateral flow devices were used in early studies, but these devices  
234 have insufficient sensitivity and specificity for use in low prevalence settings [12]. However,  
235 more recent studies using ELISA based assays with greater statistical rigor have overcome

236 some of these issues and given reliable estimates of seroprevalence in higher-transmission  
237 areas such as the United States [3, 13, 14]. More recently, commercial  
238 electrochemiluminescence-based assays have been developed that offer high degrees of  
239 sensitivity and specificity as well as standardization [6, 15]. However, these assays only  
240 assess IgG responses to a single antigen and are relatively expensive. By combining results  
241 from responses to antigens and using convergent statistical approaches we show how an  
242 assay that can be established in ordinarily equipped laboratories can obtain credible estimates  
243 of SARS-CoV-2 seroprevalence, even in low transmission settings.

244

## 245 **Acknowledgements**

246

247 The authors acknowledge the contributions of all participants, study sites, local investigators,  
248 surgical and anaesthetic teams, the study coordinators Sophie Wallace and Lucy Morris.

249

250

251 **References**

252

253 1. Oran DP, Topol EJ. Prevalence of Asymptomatic SARS-CoV-2 Infection : A Narrative  
254 Review. *Ann Intern Med* **2020**; 173:362-7.

255 2. Long QX, Liu BZ, Deng HJ, et al. Antibody responses to SARS-CoV-2 in patients with  
256 COVID-19. *Nat Med* **2020**; 26:845-8.

257 3. Havers FP, Reed C, Lim T, et al. Seroprevalence of Antibodies to SARS-CoV-2 in 10  
258 Sites in the United States, March 23-May 12, 2020. *JAMA Intern Med* **2020**.

259 4. Long QX, Tang XJ, Shi QL, et al. Clinical and immunological assessment of  
260 asymptomatic SARS-CoV-2 infections. *Nat Med* **2020**; 26:1200-4.

261 5. GeurtsvanKessel CH, Okba NMA, Igloi Z, et al. An evaluation of COVID-19 serological  
262 assays informs future diagnostics and exposure assessment. *Nat Commun* **2020**; 11:3436.

263 6. Pollan M, Perez-Gomez B, Pastor-Barriuso R, et al. Prevalence of SARS-CoV-2 in Spain  
264 (ENE-COVID): a nationwide, population-based seroepidemiological study. *Lancet* **2020**;  
265 396:535-44.

266 7. Kurth F, Roennefarth M, Thibeault C, et al. Studying the pathophysiology of coronavirus  
267 disease 2019: a protocol for the Berlin prospective COVID-19 patient cohort (Pa-COVID-  
268 19). *Infection* **2020**; 48:619-26.

269 8. Amanat F, Stadlbauer D, Strohmeier S, et al. A serological assay to detect SARS-CoV-2  
270 seroconversion in humans. *Nat Med* **2020**; 26:1033-6.

271 9. Samineni S, Parvataneni S, Kelly C, Gangur V, Karmaus W, Brooks K. Optimization,  
272 comparison, and application of colorimetric vs. chemiluminescence based indirect sandwich  
273 ELISA for measurement of human IL-23. *J Immunoassay Immunochem* **2006**; 27:183-93.

274 10. Gudbjartsson DF, Norddahl GL, Melsted P, et al. Humoral Immune Response to SARS-  
275 CoV-2 in Iceland. *N Engl J Med* **2020**.

- 276 11. Sekine T, Perez-Potti A, Rivera-Ballesteros O, et al. Robust T cell immunity in  
277 convalescent individuals with asymptomatic or mild COVID-19. bioRxiv  
278 **2020**:2020.06.29.174888.
- 279 12. Bond K, Nicholson S, Lim SM, et al. Evaluation of serological tests for SARS-CoV-2:  
280 Implications for serology testing in a low-prevalence setting. *J Infect Dis* **2020**.
- 281 13. Flannery DD, Gouma S, Dhudasia MB, et al. SARS-CoV-2 seroprevalence among  
282 parturient women in Philadelphia. *Sci Immunol* **2020**; 5:eabd5709.
- 283 14. Mansour M, Leven E, Muellers K, Stone K, Mendu DR, Wajnberg A. Prevalence of  
284 SARS-CoV-2 Antibodies Among Healthcare Workers at a Tertiary Academic Hospital in  
285 New York City. *J Gen Intern Med* **2020**; 35:2485-6.
- 286 15. Bryan A, Pepper G, Wener MH, et al. Performance Characteristics of the Abbott  
287 Architect SARS-CoV-2 IgG Assay and Seroprevalence in Boise, Idaho. *J Clin Microbiol*  
288 **2020**; 58:e00941-20.  
289

**Figure 1**

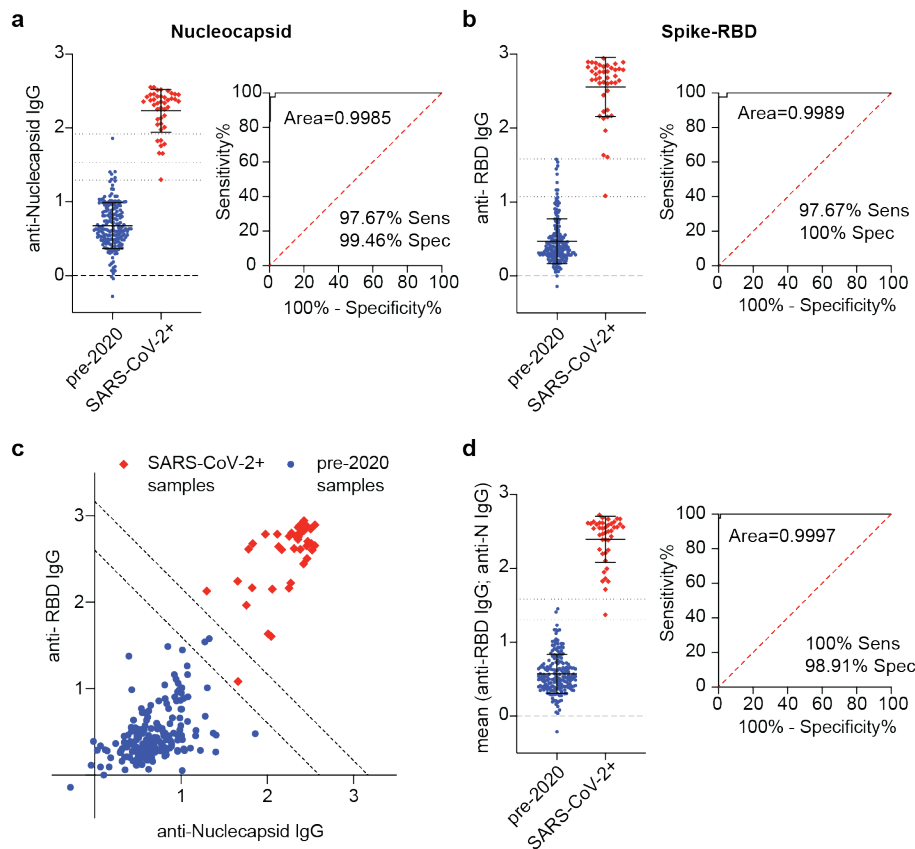

290

291 **Figure 1: Combining IgG responses to different antigens improves sensitivity and**  
292 **specificity.** IgG responses to the N antigen (a) and RBD antigen (b) among positive and  
293 negative control samples and corresponding ROC curve used to determine the 100%  
294 sensitivity and specificity cutoffs for ELISAs using that antigen (dashed black lines on  
295 graph); individual data and mean  $\pm$  SD shown. (c) Relationship between responses to the N  
296 and RBD antigens among positive and negative control samples, dashed lines represent the  
297 100% specificity and sensitivity cutoffs derived from the mean of the IgG responses to the N  
298 and RBD antigens. (d) Mean responses to the N and RBD antigens among positive and  
299 negative control samples and corresponding ROC curve.

300



Figure 2

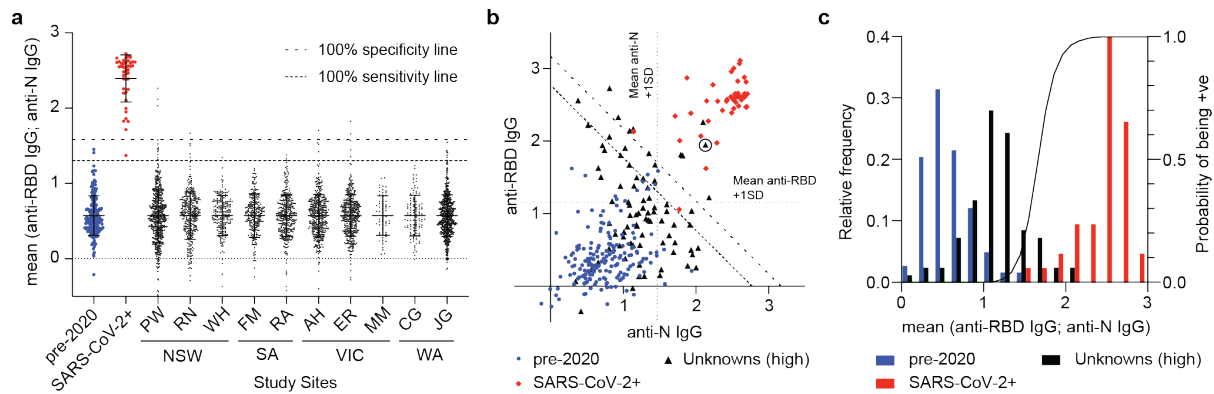

301

302

303 **Figure 2 Estimation of seroprevalence of SARS-CoV-2 in Australia** (a) Normalized  
304 averaged responses to the RBD and N antigens for each of the 2991 individuals in the study  
305 separated by study site and state. (b) Anti-N and anti-RBD responses for the top 2.7%  
306 samples from each site (n=80) compared to the positive and negative controls; the circled  
307 unknown sample was a contact of a SARS-CoV-2+ individual. (c) Frequency distribution of  
308 the negative, positive and unknown samples (bars) plotted against the calculated probability  
309 of positivity in a Bayesian model based on the distributions of the positives and negative  
310 samples.

311
